# Supplementary material
Source: Royal Society of Chemistry journal article supplement (doi:10.1039/d6an00194g)
Supplement: d6an00194g1.pdf [file d6an00194g1.pdf]

## Supporting information

### **DVB-cross-link latex microspheres to uniformly host Eu(III) chelates with moderate swelling capacity for high performance quantitative LFIA strips**

Jiannan Jia<sup>a,b,d</sup>, Hongjian Chen<sup>a</sup>, Songle Wang<sup>a</sup>, Yunpeng Wang<sup>a</sup>, Qike Wang<sup>a</sup>, Dong Chen<sup>f</sup>, Shisheng Ling<sup>f</sup>, Zhenzhen Ge<sup>f</sup>, Wenkun Dong<sup>f</sup>, Mi Yan<sup>a,c</sup>, Zhiyu Wang<sup>a</sup>, Xianping Fan<sup>a</sup>, Xu Liang<sup>e</sup>, Qiang Xu<sup>b,\*</sup> and Xvsheng Qiao<sup>a,c,\*</sup>

<sup>a</sup> *School of Material Science and Engineering, Zhejiang University, Hangzhou 310058, China*

<sup>b</sup> *Ocean Academy, Zhejiang University, Zhoushan 316021, China*

<sup>c</sup> *State Key Laboratory of Baiyunobo Rare Earth Resource Researches and Comprehensive Utilization, Baotou Research Institution of Rare Earths, Baotou 014030, China*

<sup>d</sup> *Interdisciplinary Student Training Platform for Marine areas, Zhejiang University, Hangzhou 310027, China*

<sup>e</sup> *Ocean College, Zhejiang University, Zhoushan 316021, China*

<sup>f</sup> *Assure Tec. (Hangzhou) Co.,Ltd, Hangzhou 310015, China*

\*Corresponding authors: [qiaoxus@zju.edu.cn](mailto:qiaoxus@zju.edu.cn) (X.Qiao)

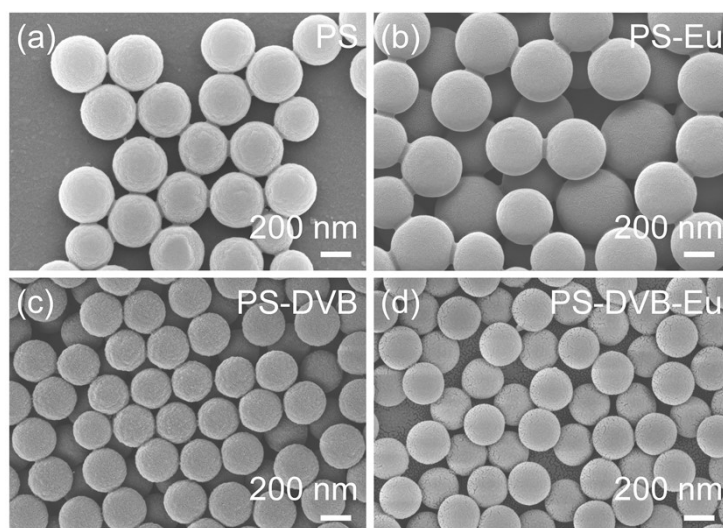

**Figure S1** SEM images of (a) PS, (c) PS-DVB microspheres, and (b) PS-Eu, (d) PS-DVB-Eu fluorescent microspheres.

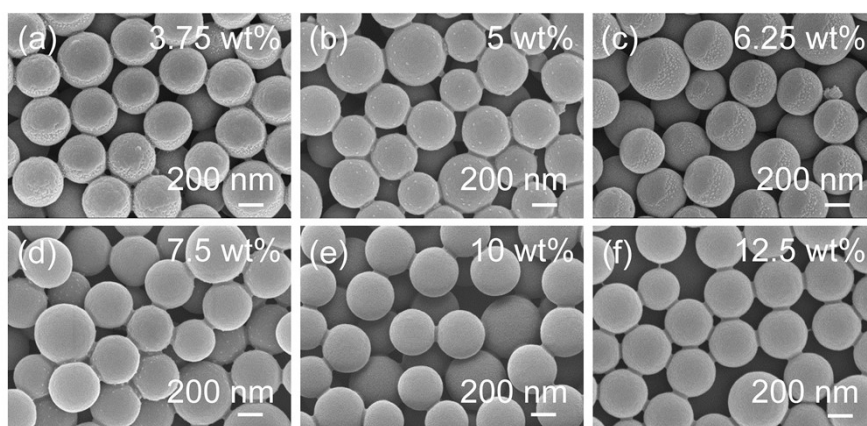

**Figure S2** SEM images of fluorescent microspheres prepared with different amount of  $\text{Eu}(\text{TTA})_3(\text{TPPO})_2$ : (a) 3.75 wt%; (b) 5.00 wt%; (c) 6.25 wt%; (d) 7.50 wt%; (e) 10.0 wt%; (f) 12.5 wt%. (wt% refers to the mass percentage of PS)

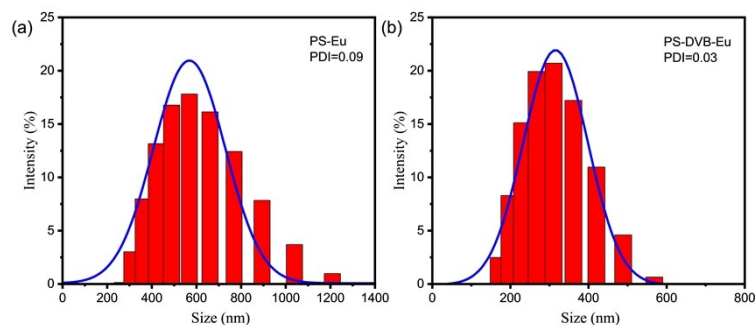

**Figure S3** The distribution of particle size and PDI value of (a) PS-Eu and (b) PS-DVB-Eu fluorescent microspheres.

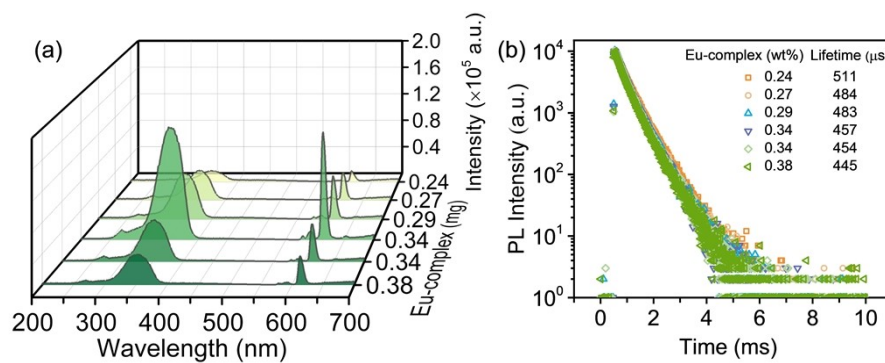

**Figure S4** (a) Fluorescence excitation and emission spectra and (b) fluorescence decay curves of PS-Eu fluorescent microspheres with different equivalent concentration of Eu-complex.

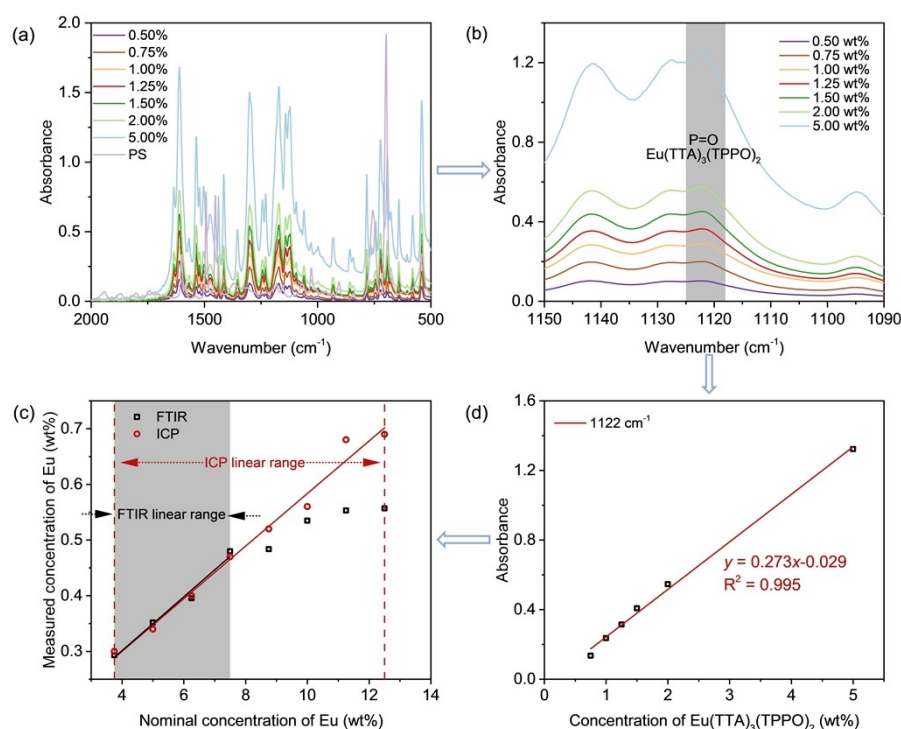

**Figure S5** (a) FTIR spectra of standard  $\text{Eu}(\text{TTA})_3(\text{TPPO})_2$  samples with gradient concentrations; (b) FTIR spectra after subtracting the baseline; (c) measured concentration of Eu from FTIR method and ICP-MS method; (d)  $\text{Eu}(\text{TTA})_3(\text{TPPO})_2$  concentration calibration curve at  $1122\text{ cm}^{-1}$ .

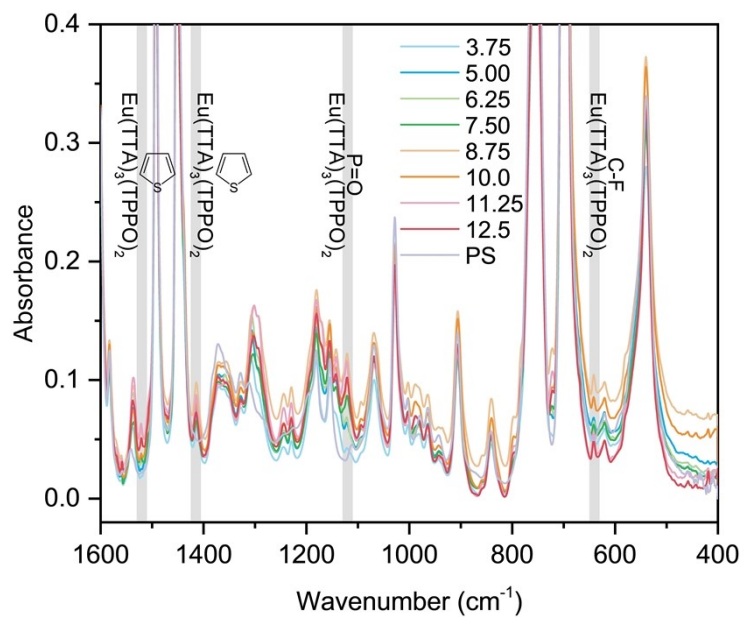

**Figure S6** Quantitative FTIR spectra of PS-DVB-Eu fluorescent microspheres with different amount of  $\text{Eu}(\text{TTA})_3(\text{TPPO})_2$ .

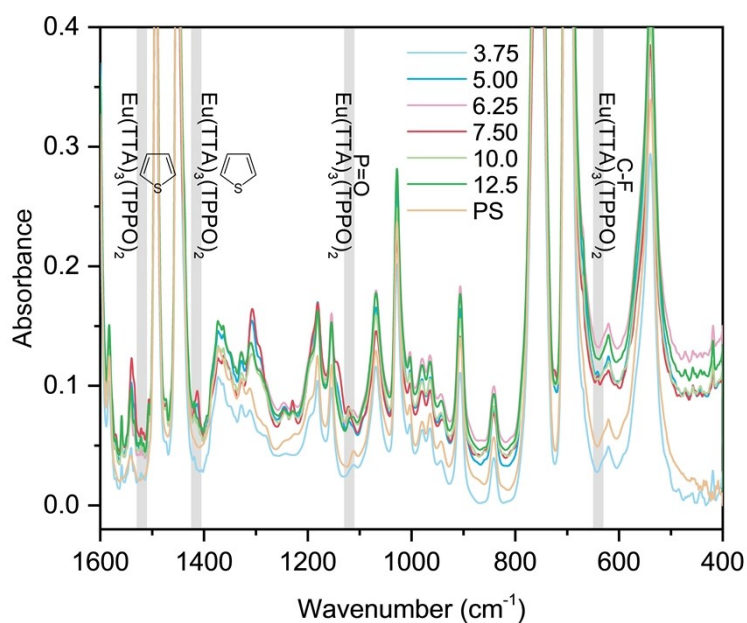

**Figure S7** Quantitative FTIR spectra of PS -Eu fluorescent microspheres with different amount of  $\text{Eu}(\text{TTA})_3(\text{TPPO})_2$ .

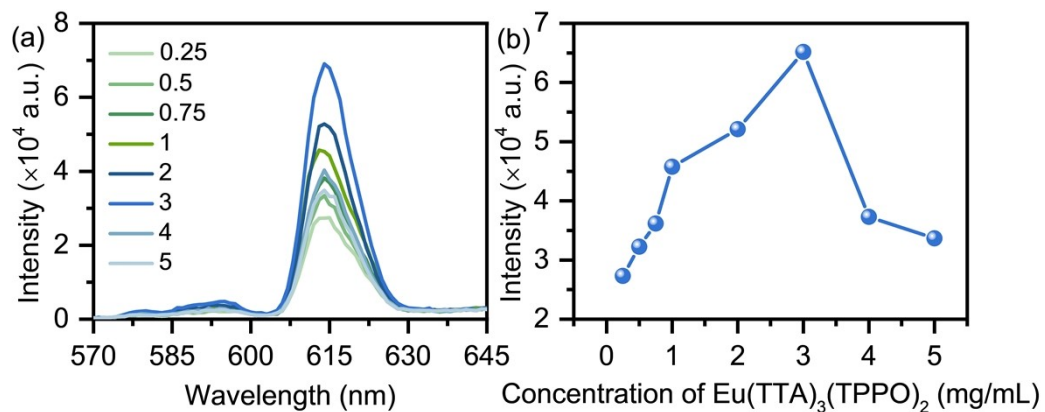

**Figure S8** (a) Fluorescence emission spectra and (b) line graph of  $\text{Eu}(\text{TTA})_2(\text{TPPO})_3$  complex with different concentration.

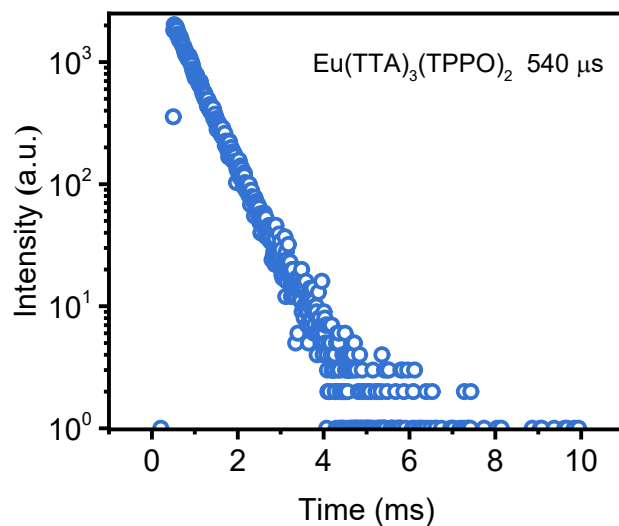

**Figure S9** Fluorescence decay curves of  $\text{Eu}(\text{TTA})_2(\text{TPPO})_3$  complex.

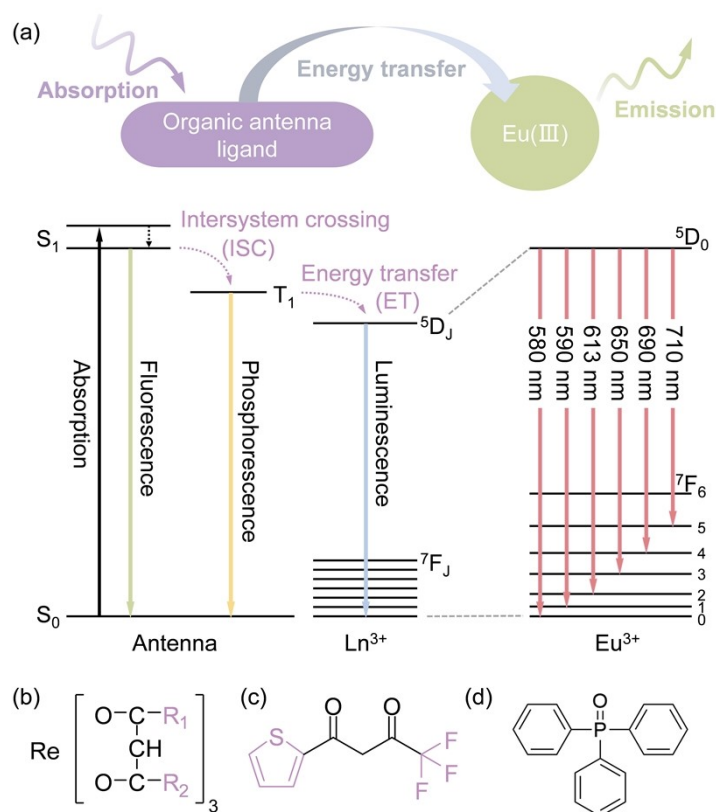

**Figure S10** (a) Mechanisms of the antenna effect.  $S_0$ : ground state of the ligand;  $S_1$ : lowest excited singlet state of the ligand;  $T_1$ : excited triplet of the ligand. Chemical structure of (b)  $\beta$ -diketone rare earth complex, (c) TTA and (d) TPPO.

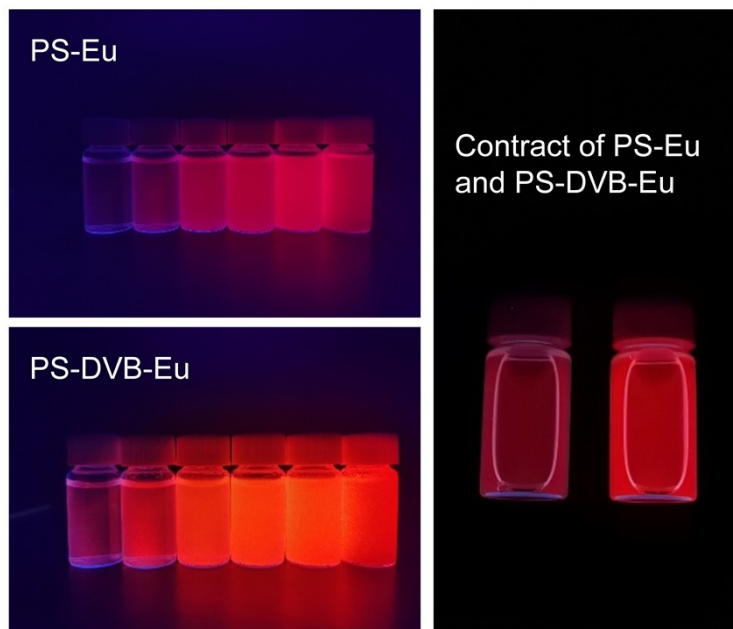

**Figure S11** Photograph of PS-Eu and PS-DVB-Eu fluorescent microspheres.

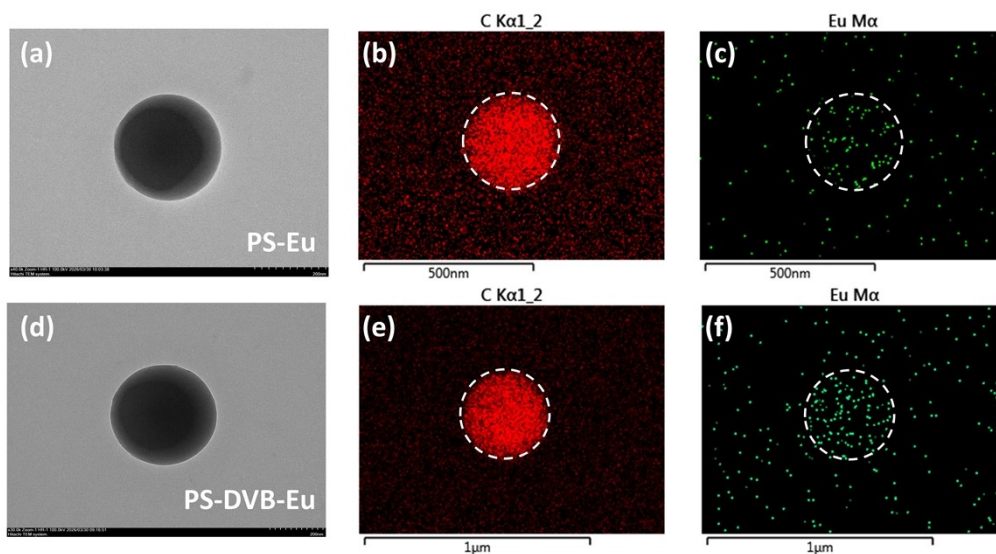

**Figure S12** TEM images (a, d) and EDS mapping (b, c, e, f) of PS-Eu and PS-DVB-Eu fluorescent microspheres.

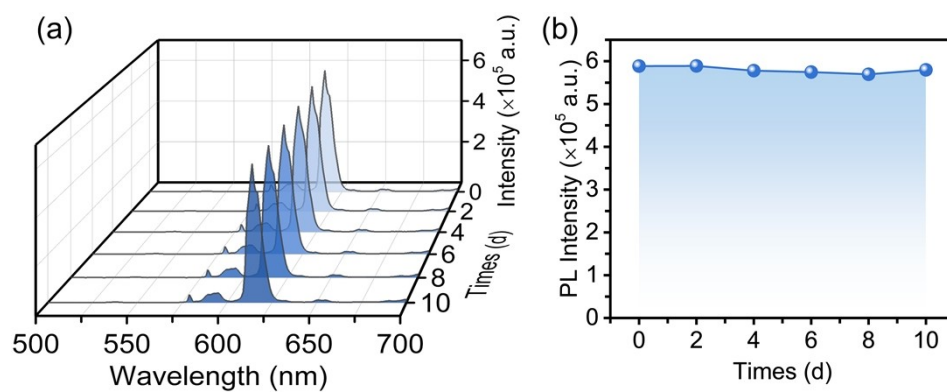

**Figure S13** (a) Fluorescent emission spectra and (b) fluorescent stability of PS-DVB-Eu fluorescent microspheres over 10 days.

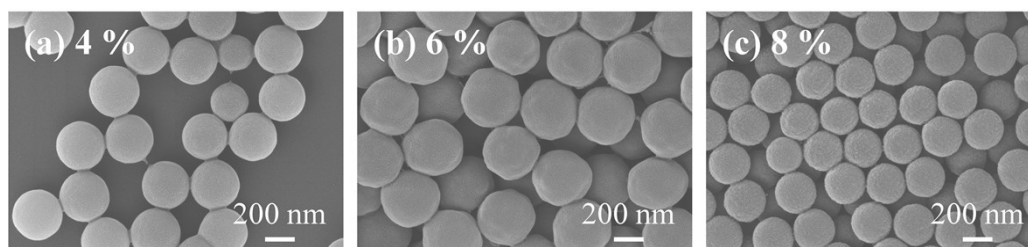

**Figure S14** SEM images of PS-DVB microspheres with different concentration of DVB: (a) 4%, (b) 6%, (c) 8%.

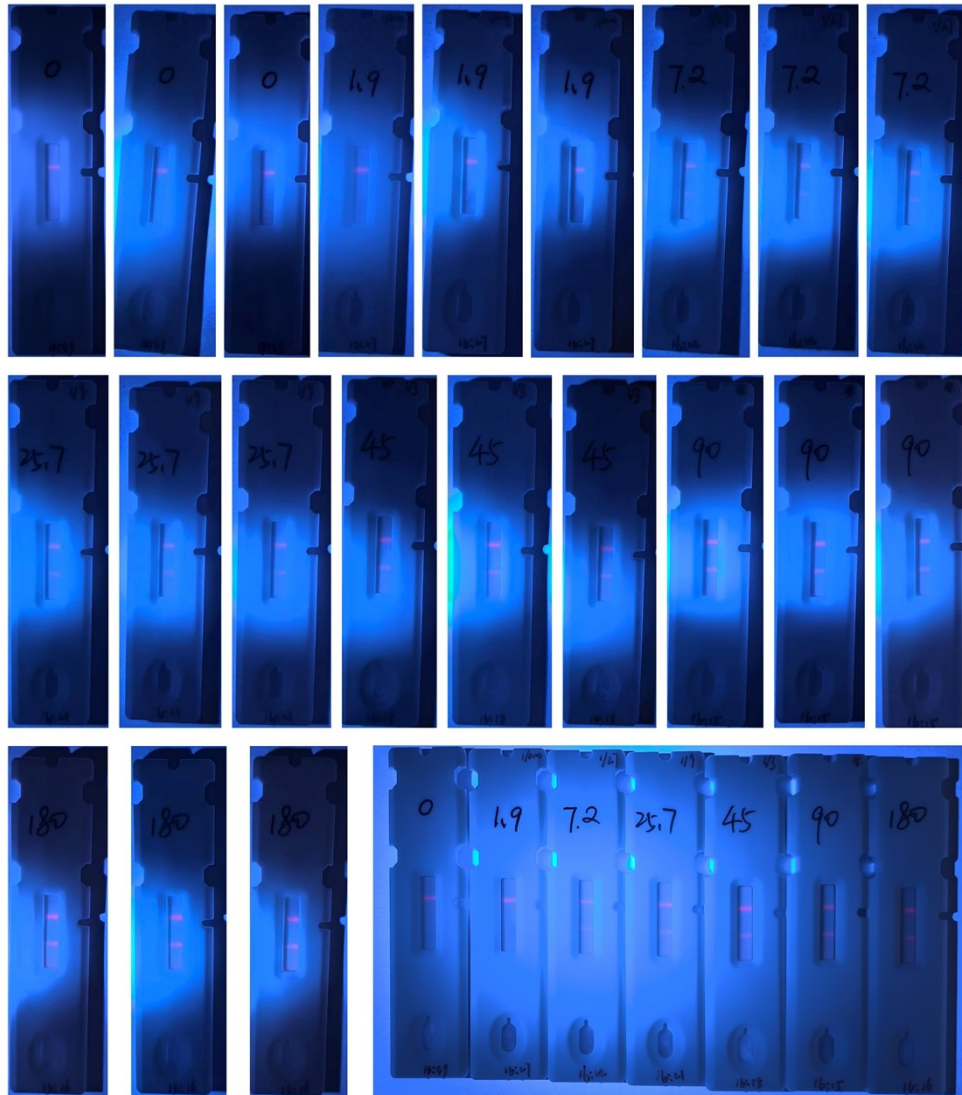

**Figure S15** The photograph of LFIA strip for CRP detection using PS-DVB-Eu fluorescent microspheres under UV excitation at 365 nm.

**Table S1** Nominal concentration versus equivalent concentration of PS-Eu fluorescent microspheres

| Eu-complex                     | PS -Eu fluorescent microspheres |      |      |      |       |       |
|--------------------------------|---------------------------------|------|------|------|-------|-------|
| Nominal concentration (wt%)    | 3.75                            | 5.00 | 6.25 | 7.50 | 10.00 | 12.50 |
| Equivalent concentration (wt%) | 0.24                            | 0.27 | 0.29 | 0.34 | 0.34  | 0.38  |

**Table S2** Zeta potential of PS-Eu and PS-DVB-Eu fluorescent microspheres

| samples   | Zeta potential (mV) |        |       |        |        |        |        |        |
|-----------|---------------------|--------|-------|--------|--------|--------|--------|--------|
| PS-Eu     | -17.4               | -19.32 | -13.4 | -15.13 | -17.98 | -13.49 |        |        |
| PS-DVB-Eu | -40.7               | -41.37 | -48.9 | -46.39 | -42.15 | -49.91 | -48.66 | -47.98 |

**Table S3** CRP detection using PS-Eu fluorescent microspheres

| Concentration<br>(ng/mL) | T1    | T2    | T3    | C1    | C2    | C3    | T/C-1  | T/C-2  | T/C-3  | CV     |
|--------------------------|-------|-------|-------|-------|-------|-------|--------|--------|--------|--------|
| 0                        | 67    | 0     | 61    | 11230 | 11691 | 11759 | 0.006  | 0      | 0.0052 | -      |
| 0.8                      | 587   | 473   | 603   | 9654  | 10059 | 10092 | 0.0608 | 0.047  | 0.0598 | 13.73% |
| 1.9                      | 845   | 1083  | 898   | 8497  | 10309 | 8963  | 0.0994 | 0.1051 | 0.1002 | 3.00%  |
| 7.2                      | 5052  | 5145  | 6322  | 10250 | 10689 | 11475 | 0.4929 | 0.4813 | 0.5509 | 7.34%  |
| 25.7                     | 13128 | 14981 | 13635 | 10300 | 11321 | 11531 | 1.2746 | 1.3233 | 1.1825 | 5.68%  |
| 45                       | 19089 | 17480 | 19224 | 11209 | 9876  | 11941 | 1.703  | 1.7699 | 1.6099 | 4.74%  |
| 90                       | 27076 | 27638 | 25164 | 10864 | 11647 | 10737 | 2.4923 | 2.373  | 2.3437 | 3.28%  |
| 180                      | 26469 | 28728 | 27694 | 8992  | 9151  | 9002  | 2.9436 | 3.1393 | 3.0764 | 3.27%  |

**Table S4** CRP detection using PS-DVB-Eu fluorescent microspheres

| Concentration<br>(ng/mL) | T1    | T2    | T3    | C1    | C2    | C3    | T/C-1  | T/C-2  | T/C-3  | CV     |
|--------------------------|-------|-------|-------|-------|-------|-------|--------|--------|--------|--------|
| 0                        | 3     | 0     | 58    | 12381 | 11581 | 12603 | 0.0002 | 0      | 0.0046 | -      |
| 0.8                      | 292   | 273   | 262   | 9260  | 9541  | 10299 | 0.0315 | 0.0286 | 0.0254 | 10.68% |
| 1.9                      | 471   | 464   | 553   | 8572  | 10002 | 10640 | 0.0549 | 0.0464 | 0.052  | 8.50%  |
| 7.2                      | 3142  | 2892  | 3183  | 10684 | 11496 | 10690 | 0.2941 | 0.2516 | 0.2978 | 9.13%  |
| 25.7                     | 7145  | 6727  | 6477  | 12013 | 10189 | 10063 | 0.5948 | 0.6602 | 0.6436 | 5.38%  |
| 45                       | 10030 | 11016 | 10580 | 9743  | 11407 | 11910 | 1.0295 | 0.9657 | 0.8883 | 7.35%  |
| 90                       | 13673 | 13185 | 14259 | 10350 | 10290 | 10946 | 1.3211 | 1.2813 | 1.3027 | 1.53%  |
| 180                      | 14399 | 16137 | 14523 | 8810  | 9684  | 8591  | 1.6344 | 1.6664 | 1.6905 | 1.69%  |
